# Supplementary material for: Digital literacy, psychological resilience, and work stress among nurses: the moderating role of ward environment
Source: Front Psychol. 2026 Apr 29;17:1810798. doi: 10.3389/fpsyg.2026.1810798 (PMC13167963; doi:10.3389/fpsyg.2026.1810798)
Supplement: Supplementary file 1 [file Data_Sheet_1.xlsx]

## Sheet: Sheet1
Run MATRIX procedure:
***************** PROCESS Procedure for SPSS Version 4.2 *****************
Written by Andrew F. Hayes, Ph.D. www.afhayes.com
Documentation available in Hayes (2022). www.guilford.com/p/hayes3
**************************************************************************
Model : 4
Y : NIS
X : IMS
M1 : PSB
M2 : DCCL
Covariates:
AGE HOG HOT
Sample
Size: 302
**************************************************************************
OUTCOME VARIABLE:
PSB
Model Summary
R R-sq MSE F df1 df2 p
.4616 .2131 .7974 20.1093 4.0000 297.0000 .0000
Model
coeff se t p LLCI ULCI
constant -.5597 .2524 -2.2177 .0273 -1.0563 -.0630
IMS -.4317 .0518 -8.3335 .0000 -.5337 -.3298
AGE .0407 .0692 .5883 .5568 -.0955 .1770
HOG .1780 .1595 1.1163 .2652 -.1358 .4919
HOT .0700 .1043 .6708 .5029 -.1353 .2753
**************************************************************************
OUTCOME VARIABLE:
DCCL
Model Summary
R R-sq MSE F df1 df2 p
.5476 .2999 .7092 31.8067 4.0000 297.0000 .0000
Model
coeff se t p LLCI ULCI
constant -.6996 .2380 -2.9392 .0035 -1.1680 -.2312
IMS -.5103 .0489 -10.4430 .0000 -.6064 -.4141
AGE .1069 .0653 1.6375 .1026 -.0216 .2354
HOG .2407 .1504 1.6004 .1106 -.0553 .5368
HOT .0312 .0984 .3174 .7512 -.1624 .2249
**************************************************************************
OUTCOME VARIABLE:
NIS
Model Summary
R R-sq MSE F df1 df2 p
.6400 .4096 .6015 34.1122 6.0000 295.0000 .0000
Model
coeff se t p LLCI ULCI
constant -.3007 .2226 -1.3510 .1777 -.7387 .1373
IMS -.4215 .0533 -7.9061 .0000 -.5264 -.3166
PSB .2646 .0595 4.4502 .0000 .1476 .3816
DCCL .0480 .0630 .7615 .4470 -.0761 .1721
AGE .1156 .0604 1.9142 .0566 -.0033 .2345
HOG -.1287 .1391 -.9250 .3557 -.4025 .1451
HOT .1189 .0907 1.3113 .1908 -.0596 .2974
************************** TOTAL EFFECT MODEL ****************************
OUTCOME VARIABLE:
NIS
Model Summary
R R-sq MSE F df1 df2 p
.5855 .3428 .6650 38.7335 4.0000 297.0000 .0000
Model
coeff se t p LLCI ULCI
constant -.4824 .2305 -2.0929 .0372 -.9359 -.0288
IMS -.5602 .0473 -11.8405 .0000 -.6533 -.4671
AGE .1315 .0632 2.0806 .0383 .0071 .2560
HOG -.0700 .1457 -.4808 .6310 -.3567 .2166
HOT .1389 .0953 1.4581 .1459 -.0486 .3265
************** TOTAL, DIRECT, AND INDIRECT EFFECTS OF X ON Y **************
Total effect of X on Y
Effect se t p LLCI ULCI
-.5602 .0473 -11.8405 .0000 -.6533 -.4671
Direct effect of X on Y
Effect se t p LLCI ULCI
-.4215 .0533 -7.9061 .0000 -.5264 -.3166
Indirect effect(s) of X on Y:
Effect BootSE BootLLCI BootULCI
TOTAL -.1387 .0333 -.2099 -.0780
PSB -.1142 .0461 -.2229 -.0460
DCCL -.0245 .0364 -.0891 .0548
*********************** ANALYSIS NOTES AND ERRORS ************************
Level of confidence for all confidence intervals in output:
95
Number of bootstrap samples for percentile bootstrap confidence intervals:
5000
------ END MATRIX -----
Run MATRIX procedure:
***************** PROCESS Procedure for SPSS Version 4.2 *****************
Written by Andrew F. Hayes, Ph.D. www.afhayes.com
Documentation available in Hayes (2022). www.guilford.com/p/hayes3
**************************************************************************
Model : 6
Y : NIS
X : IMS
M1 : PSB
M2 : DCCL
Sample
Size: 302
**************************************************************************
OUTCOME VARIABLE:
PSB
Model Summary
R R-sq MSE F df1 df2 p
.4451 .1982 .8044 74.1357 1.0000 300.0000 .0000
Model
coeff se t p LLCI ULCI
constant .0001 .0516 .0010 .9992 -.1015 .1016
IMS -.4451 .0517 -8.6102 .0000 -.5468 -.3434
**************************************************************************
OUTCOME VARIABLE:
DCCL
Model Summary
R R-sq MSE F df1 df2 p
.6987 .4882 .5150 142.5977 2.0000 299.0000 .0000
Model
coeff se t p LLCI ULCI
constant -.0002 .0413 -.0047 .9963 -.0815 .0811
IMS -.2988 .0462 -6.4682 .0000 -.3897 -.2079
PSB .5123 .0462 11.0898 .0000 .4214 .6032
**************************************************************************
OUTCOME VARIABLE:
NIS
Model Summary
R R-sq MSE F df1 df2 p
.6319 .3994 .6058 66.0445 3.0000 298.0000 .0000
Model
coeff se t p LLCI ULCI
constant -.0022 .0448 -.0491 .9609 -.0903 .0859
IMS -.4233 .0535 -7.9143 .0000 -.5286 -.3181
PSB .2650 .0595 4.4524 .0000 .1479 .3822
DCCL .0584 .0627 .9315 .3523 -.0650 .1819
************************** TOTAL EFFECT MODEL ****************************
OUTCOME VARIABLE:
NIS
Model Summary
R R-sq MSE F df1 df2 p
.5725 .3278 .6735 146.2673 1.0000 300.0000 .0000
Model
coeff se t p LLCI ULCI
constant -.0022 .0472 -.0465 .9630 -.0951 .0907
IMS -.5721 .0473 -12.0941 .0000 -.6651 -.4790
************** TOTAL, DIRECT, AND INDIRECT EFFECTS OF X ON Y **************
Total effect of X on Y
Effect se t p LLCI ULCI
-.5721 .0473 -12.0941 .0000 -.6651 -.4790
Direct effect of X on Y
Effect se t p LLCI ULCI
-.4233 .0535 -7.9143 .0000 -.5286 -.3181
Indirect effect(s) of X on Y:
Effect BootSE BootLLCI BootULCI
TOTAL -.1487 .0338 -.2220 -.0904
Ind1 -.1180 .0484 -.2312 -.0480
Ind2 -.0175 .0222 -.0620 .0246
Ind3 -.0133 .0166 -.0408 .0261
Indirect effect key:
Ind1 IMS -> PSB -> NIS
Ind2 IMS -> DCCL -> NIS
Ind3 IMS -> PSB -> DCCL -> NIS
*********************** ANALYSIS NOTES AND ERRORS ************************
Level of confidence for all confidence intervals in output:
95
Number of bootstrap samples for percentile bootstrap confidence intervals:
5000
------ END MATRIX -----
Run MATRIX procedure:
***************** PROCESS Procedure for SPSS Version 4.2 *****************
Written by Andrew F. Hayes, Ph.D. www.afhayes.com
Documentation available in Hayes (2022). www.guilford.com/p/hayes3
**************************************************************************
Model : 7
Y : NIS
X : IMS
M : PSB
W : DCCL
Sample
Size: 302
**************************************************************************
OUTCOME VARIABLE:
PSB
Model Summary
R R-sq MSE F df1 df2 p
.6805 .4631 .5422 85.6723 3.0000 298.0000 .0000
Model
coeff se t p LLCI ULCI
constant .0858 .0471 1.8214 .0695 -.0069 .1785
IMS -.1252 .0502 -2.4949 .0131 -.2239 -.0264
DCCL .5023 .0524 9.5772 .0000 .3991 .6055
Int_1 .1632 .0392 4.1637 .0000 .0861 .2403
Product terms key:
Int_1 : IMS x DCCL
Test(s) of highest order unconditional interaction(s):
R2-chng F df1 df2 p
X*W .0312 17.3361 1.0000 298.0000 .0000
----------
Focal predict: IMS (X)
Mod var: DCCL (W)
Conditional effects of the focal predictor at values of the moderator(s):
DCCL Effect se t p LLCI ULCI
-1.0003 -.2884 .0606 -4.7585 .0000 -.4077 -.1691
-.0005 -.1253 .0502 -2.4965 .0131 -.2240 -.0265
.9993 .0379 .0666 .5693 .5696 -.0931 .1689
**************************************************************************
OUTCOME VARIABLE:
NIS
Model Summary
R R-sq MSE F df1 df2 p
.6306 .3976 .6055 98.6765 2.0000 299.0000 .0000
Model
coeff se t p LLCI ULCI
constant -.0022 .0448 -.0494 .9607 -.0903 .0859
IMS -.4408 .0501 -8.8003 .0000 -.5393 -.3422
PSB .2949 .0501 5.8881 .0000 .1964 .3935
****************** DIRECT AND INDIRECT EFFECTS OF X ON Y *****************
Direct effect of X on Y
Effect se t p LLCI ULCI
-.4408 .0501 -8.8003 .0000 -.5393 -.3422
Conditional indirect effects of X on Y:
INDIRECT EFFECT:
IMS -> PSB -> NIS
DCCL Effect BootSE BootLLCI BootULCI
-1.0003 -.0851 .0289 -.1522 -.0399
-.0005 -.0369 .0171 -.0766 -.0100
.9993 .0112 .0188 -.0243 .0509
Index of moderated mediation:
Index BootSE BootLLCI BootULCI
DCCL .0481 .0173 .0212 .0891
*********************** ANALYSIS NOTES AND ERRORS ************************
Level of confidence for all confidence intervals in output:
95
Number of bootstrap samples for percentile bootstrap confidence intervals:
10000
W values in conditional tables are the mean and +/- SD from the mean.
------ END MATRIX -----
Run MATRIX procedure:
***************** PROCESS Procedure for SPSS Version 4.2 *****************
Written by Andrew F. Hayes, Ph.D. www.afhayes.com
Documentation available in Hayes (2022). www.guilford.com/p/hayes3
**************************************************************************
Model : 58
Y : NIS
X : IMS
M : PSB
W : DCCL
Covariates:
AGE HOG HOT
Sample
Size: 302
**************************************************************************
OUTCOME VARIABLE:
PSB
Model Summary
R R-sq MSE F df1 df2 p
.6842 .4682 .5425 43.2854 6.0000 295.0000 .0000
Model
coeff se t p LLCI ULCI
constant -.1458 .2112 -.6902 .4906 -.5615 .2699
IMS -.1232 .0502 -2.4528 .0148 -.2220 -.0243
DCCL .4906 .0534 9.1855 .0000 .3855 .5957
Int_1 .1703 .0394 4.3169 .0000 .0926 .2479
AGE -.0217 .0574 -.3790 .7050 -.1346 .0912
HOG .0421 .1321 .3187 .7502 -.2179 .3021
HOT .0823 .0864 .9530 .3414 -.0877 .2522
Product terms key:
Int_1 : IMS x DCCL
Test(s) of highest order unconditional interaction(s):
R2-chng F df1 df2 p
X*W .0336 18.6358 1.0000 295.0000 .0000
----------
Focal predict: IMS (X)
Mod var: DCCL (W)
Conditional effects of the focal predictor at values of the moderator(s):
DCCL Effect se t p LLCI ULCI
-1.0003 -.2935 .0607 -4.8349 .0000 -.4129 -.1740
-.0005 -.1233 .0502 -2.4545 .0147 -.2221 -.0244
.9993 .0470 .0668 .7028 .4828 -.0846 .1785
**************************************************************************
OUTCOME VARIABLE:
NIS
Model Summary
R R-sq MSE F df1 df2 p
.6421 .4123 .6008 29.4658 7.0000 294.0000 .0000
Model
coeff se t p LLCI ULCI
constant -.3278 .2237 -1.4656 .1438 -.7680 .1124
IMS -.4357 .0547 -7.9698 .0000 -.5433 -.3281
PSB .2706 .0596 4.5364 .0000 .1532 .3879
DCCL .0665 .0650 1.0234 .3070 -.0614 .1944
Int_1 .0520 .0448 1.1605 .2468 -.0362 .1401
AGE .1194 .0605 1.9743 .0493 .0004 .2383
HOG -.1332 .1391 -.9578 .3390 -.4070 .1405
HOT .1166 .0907 1.2866 .1993 -.0618 .2950
Product terms key:
Int_1 : PSB x DCCL
Test(s) of highest order unconditional interaction(s):
R2-chng F df1 df2 p
M*W .0027 1.3468 1.0000 294.0000 .2468
****************** DIRECT AND INDIRECT EFFECTS OF X ON Y *****************
Direct effect of X on Y
Effect se t p LLCI ULCI
-.4357 .0547 -7.9698 .0000 -.5433 -.3281
Conditional indirect effects of X on Y:
INDIRECT EFFECT:
IMS -> PSB -> NIS
DCCL Effect BootSE BootLLCI BootULCI
-1.0003 -.0642 .0309 -.1390 -.0169
-.0005 -.0333 .0203 -.0851 -.0071
.9993 .0151 .0231 -.0279 .0678
*********************** ANALYSIS NOTES AND ERRORS ************************
Level of confidence for all confidence intervals in output:
95
Number of bootstrap samples for percentile bootstrap confidence intervals:
10000
W values in conditional tables are the mean and +/- SD from the mean.
